# Supplementary material for: Comparison of Direct Oral Anticoagulant Use for the Treatment of Non-Valvular Atrial Fibrillation in Pivotal Clinical Trials vs. the Real-World Setting: A Population-Based Study from Southern Italy
Source: Pharmaceuticals (Basel). 2021 Mar 25;14(4):290. doi: 10.3390/ph14040290 (PMC8064382; doi:10.3390/ph14040290)
Supplement: Supplementary file 1 [file pharmaceuticals-14-00290-s001.zip › Table S1.pdf]

**Supplement Table S1.** Comparative characteristics of DOACs pivotal trials and Palermo claims database.

|                  | DABIGATRAN                                                                                               |         |                                                        |       | RIVAROXABAN                                                                                          |                                                        | APIXABAN                                                                                       |                                                        | EDOXABAN                                                                                                 |         |                                                        |        |
|------------------|----------------------------------------------------------------------------------------------------------|---------|--------------------------------------------------------|-------|------------------------------------------------------------------------------------------------------|--------------------------------------------------------|------------------------------------------------------------------------------------------------|--------------------------------------------------------|----------------------------------------------------------------------------------------------------------|---------|--------------------------------------------------------|--------|
| Data source      | RE-LY (2009)                                                                                             |         | Palermo claims database                                |       | ROCKET- AF (2011)                                                                                    | Palermo claims database                                | ARISTOTLE (2011)                                                                               | Palermo claims database                                | ENGAGE AF-TIMI 48 (2013)                                                                                 |         | Palermo claims database                                |        |
| Study design     | Pivotal randomized trial                                                                                 |         | Observational, non-interventional, retrospective study |       | Pivotal, multicenter, randomized, double-blind, double-dummy, event-driven trial                     | Observational, non-interventional, retrospective study | Pivotal, randomized, double-blind trial                                                        | Observational, non-interventional, retrospective study | Pivotal, randomized, double-blind, double-dummy trial                                                    |         | Observational, non-interventional, retrospective study |        |
| Study Years      | <u>Enrolment:</u><br>December 2005-<br>December 2007;<br><br><u>Final follow-up visit:</u><br>April 2009 |         | January 2013-<br>December 2017                         |       | <u>Enrolment:</u><br>December 2006- June 2009<br><br><u>Final follow-up visit:</u><br>September 2010 | January 2013-<br>December 2017                         | <u>Enrolment:</u><br>December 2006- April2010<br><br><u>Final follow-up visit:</u><br>May 2011 | January 2013-<br>December 2017                         | <u>Enrolment:</u> November 2008- November 2010<br><br><u>Final follow-up visit:</u><br>May 2013          |         | January 2013-<br>December 2017                         |        |
| Study drugs      | Dose-specific comparison                                                                                 |         |                                                        |       | Non dose-specific comparison                                                                         |                                                        | Non dose-specific comparison                                                                   |                                                        | Dose-specific comparison                                                                                 |         |                                                        |        |
| Study Population | N=6,015                                                                                                  | N=6,076 | N= 794                                                 | N=635 | N=7,131                                                                                              | N= 3,028                                               | N=9,120                                                                                        | N= 2,113                                               | N=7,034                                                                                                  | N=7,035 | N= 253                                                 | N= 269 |
|                  | From: USA, Canada, Central Europe, Western Europe, Latin America, Asia and other                         |         | From: Palermo LHU                                      |       | From: North America, Latin America, West Europe, East Europe, Asia Pacific                           | From: Palermo LHU                                      | From: North America, South America, Europe or Asia Pacific                                     | From: Palermo LHU                                      | From: North America, Latin America, Western Europe, Eastern Europe, Asia pacific region and South Africa |         | From: Palermo LHU                                      |        |
