# Supplementary material for: Comparison of Direct Oral Anticoagulant Use for the Treatment of Non-Valvular Atrial Fibrillation in Pivotal Clinical Trials vs. the Real-World Setting: A Population-Based Study from Southern Italy
Source: Pharmaceuticals (Basel). 2021 Mar 25;14(4):290. doi: 10.3390/ph14040290 (PMC8064382; doi:10.3390/ph14040290)
Supplement: Supplementary file 1 [file pharmaceuticals-14-00290-s001.zip › Table S2.pdf]

**Supplement Table S2.** List of study drugs.

| DOAC                        | ATC code | AIC code  |
|-----------------------------|----------|-----------|
| Dabigatran 110 mg           | B01AE07  | 038451050 |
|                             |          | 038451062 |
|                             |          | 038451074 |
|                             |          | 038451086 |
|                             |          | 038451148 |
| Dabigatran 150 mg           |          | 038451124 |
|                             |          | 038451098 |
|                             |          | 038451100 |
|                             |          | 038451112 |
|                             |          | 038451136 |
| Rivaroxaban 10 – 15 – 20 mg | B01AF01  | -         |
| Apixaban 2.5 – 5 mg         | B01AF02  | -         |
| Edoxaban 30 mg              | B01AF03  | 044315024 |
|                             |          | 044315137 |
|                             |          | 044315125 |
|                             |          | 044315152 |
|                             |          | 044315048 |
|                             |          | 044315051 |
|                             |          | 044315063 |
|                             |          | 044315149 |
|                             |          | 044315075 |
|                             |          | 044315087 |
|                             |          | 044315099 |
|                             |          | 044315101 |
|                             |          | 044315113 |
| Edoxaban 60 mg              |          | 044315036 |
|                             |          | 044315265 |
|                             |          | 044315253 |
|                             |          | 044315289 |
|                             |          | 044315176 |
|                             |          | 044315188 |
|                             |          | 044315190 |
|                             |          | 044315277 |
|                             |          | 044315202 |
|                             |          | 044315214 |
|                             |          | 044315226 |
|                             |          | 044315238 |
|                             |          | 044315240 |

**Legend:** DOAC= direct oral anticoagulant; ATC= Anatomical Therapeutic Chemical classification system; AIC= Italian marketing authorization.
