# Supplementary material for: Comparison of Direct Oral Anticoagulant Use for the Treatment of Non-Valvular Atrial Fibrillation in Pivotal Clinical Trials vs. the Real-World Setting: A Population-Based Study from Southern Italy
Source: Pharmaceuticals (Basel). 2021 Mar 25;14(4):290. doi: 10.3390/ph14040290 (PMC8064382; doi:10.3390/ph14040290)
Supplement: Supplementary file 1 [file pharmaceuticals-14-00290-s001.zip › Table S3.pdf]

**Supplement Table S3.** ICD-9 codes identifying effectiveness outcome.

| Category        | ICD9   | Description                                                                                    |
|-----------------|--------|------------------------------------------------------------------------------------------------|
| Ischemic Stroke | 433    | Occlusion and stenosis of precerebral arteries                                                 |
|                 | 434    | Occlusion of cerebral arteries                                                                 |
|                 | 433.0  | Occlusion and stenosis of basilar artery                                                       |
|                 | 433.1  | Occlusion and stenosis of carotid artery                                                       |
|                 | 433.2  | Vertebral artery                                                                               |
|                 | 433.3  | Multiple and bilateral                                                                         |
|                 | 433.8  | Other specified precerebral artery                                                             |
|                 | 433.9  | Unspecified precerebral artery                                                                 |
|                 | 434.0  | Cerebral thrombosis                                                                            |
|                 | 434.1  | Cerebral embolism                                                                              |
|                 | 434.9  | Cerebral artery occlusion unspecified                                                          |
|                 | 437.1  | Other generalized ischemic cerebrovascular disease                                             |
|                 | 433.01 | Occlusion and stenosis of basilar artery with cerebral infarction                              |
|                 | 433.11 | Occlusion and stenosis of carotid artery with cerebral infarction                              |
|                 | 433.21 | Occlusion and stenosis of vertebral artery with cerebral infarction                            |
|                 | 433.31 | Occlusion and stenosis of multiple and bilateral precerebral arteries with cerebral infarction |
|                 | 433.81 | Occlusion and stenosis of other specified precerebral artery with cerebral infarction          |
|                 | 433.91 | Occlusion and stenosis of unspecified precerebral artery with cerebral infarction              |
|                 | 434.01 | Cerebral thrombosis with cerebral infarction                                                   |
|                 | 434.11 | Cerebral embolism with cerebral infarction                                                     |
|                 | 434.91 | Cerebral artery occlusion, unspecified with cerebral infarction                                |
