# Supplementary material for: Comparison of Direct Oral Anticoagulant Use for the Treatment of Non-Valvular Atrial Fibrillation in Pivotal Clinical Trials vs. the Real-World Setting: A Population-Based Study from Southern Italy
Source: Pharmaceuticals (Basel). 2021 Mar 25;14(4):290. doi: 10.3390/ph14040290 (PMC8064382; doi:10.3390/ph14040290)
Supplement: Supplementary file 1 [file pharmaceuticals-14-00290-s001.zip › Table S4.pdf]

**Supplement Table S4.** ICD-9 codes identifying safety outcomes.

| Category                  | ICD9   | Description                                                                         |
|---------------------------|--------|-------------------------------------------------------------------------------------|
| Gastrointestinal bleeding | 455.2  | Internal hemorrhoids with other complication                                        |
|                           | 455.5  | External hemorrhoids with other complication                                        |
|                           | 455.8  | Unspecified hemorrhoids with other complication                                     |
|                           | 456.0  | Esophageal varices with bleeding                                                    |
|                           | 530.7  | Gastroesophageal laceration-hemorrhage syndrom                                      |
|                           | 456.20 | Esophageal varices in diseases classified elsewhere: with bleeding                  |
|                           | 535.61 | Duodenitis with hemorrhage                                                          |
|                           | 535.71 | Eosinophilic gastritis with hemorrhage                                              |
|                           | 456.0  | Esophageal varices with bleeding                                                    |
|                           | 456.20 | Esophageal varices in diseases classified elsewhere with bleeding                   |
|                           | 530.21 | Ulcer of esophagus with bleeding                                                    |
|                           | 530.82 | Esophageal hemorrhage                                                               |
|                           | 531.0  | Gastric ulcer acute with hemorrhage                                                 |
|                           | 531.2  | Gastric ulcer acute with hemorrhage and perforation                                 |
|                           | 531.4  | Gastric ulcer chronic or unspecified with hemorrhage                                |
|                           | 531.6  | Gastric ulcer chronic or unspecified with hemorrhage and perforation                |
|                           | 532.0  | duodenal ulcer acute with hemorrhage                                                |
|                           | 532.2  | Duodenal ulcer acute with hemorrhage and perforation                                |
|                           | 532.4  | duodenal ulcer chronic or unspecified with hemorrhage                               |
|                           | 532.6  | Duodenal ulcer chronic or unspecified with hemorrhage and perforation               |
|                           | 533.0  | Peptic ulcer, site unspecified acute with hemorrhage                                |
|                           | 533.2  | Peptic ulcer, site unspecified acute with hemorrhage and perforation                |
|                           | 533.4  | Peptic ulcer, site unspecified chronic or unspecified with hemorrhage               |
|                           | 533.6  | Peptic ulcer, site unspecified chronic or unspecified with hemorrhage and perforati |
|                           | 534.0  | Gastrojejunal ulcer acute with hemorrhage                                           |
|                           | 534.2  | Gastrojejunal ulcer acute with hemorrhage and perforation                           |
|                           | 534.4  | Gastrojejunal ulcer chronic or unspecified with hemorrhage                          |
|                           | 534.6  | Gastrojejunal ulcer chronic or unspecified with hemorrhage and perforation          |
|                           | 535.01 | Acute gastritis, with hemorrhage                                                    |
|                           | 535.11 | Atrophic gastritis with hemorrhage                                                  |
|                           | 535.21 | Gastric mucosal hypertrophy with hemorrhage                                         |
|                           | 535.31 | Alcoholic gastritis with hemorrhage                                                 |
|                           | 535.41 | Other specified gastritis, with hemorrhage                                          |
|                           | 535.51 | Unspecified gastritis and gastroduodenitis, with hemorrhage                         |
|                           | 537.83 | Angiodysplasia of stomach and duodenum with hemorrhage                              |
|                           | 557.0  | Acute vascular insufficiency of intestine                                           |
|                           | 562.02 | Diverticulosis of small intestine with hemorrhage                                   |
|                           | 562.03 | Diverticulitis of small intestine with hemorrhage                                   |
|                           | 562.12 | Diverticulosis of colon with hemorrhage                                             |
|                           | 562.13 | Diverticulitis of colon with hemorrhage                                             |
|                           | 569.3  | Hemorrhage of rectum and anus                                                       |

|                          |        |                                                                                                              |
|--------------------------|--------|--------------------------------------------------------------------------------------------------------------|
|                          | 569.85 | Angiodysplasia of intestine with hemorrhage                                                                  |
|                          | 578    | Gastrointestinal hemorrhage                                                                                  |
| Intracranial<br>bleeding | 853.0  | Other and unspecified intracranial hemorrhage following injury Without<br>mention of open intracranial wound |
|                          | 430    | Subarachnoid hemorrhage                                                                                      |
|                          | 431    | Intracerebral hemorrhage                                                                                     |
|                          | 432    | Other and unspecified intracranial hemorrhage                                                                |
|                          | 852    | Subarachnoid, subdural, and extradural hemorrhage, following injury                                          |
|                          | 853    | Other and unspecified intracranial hemorrhage following injury                                               |
